# Supplementary material for: Lanthanum-based nanomaterials suppress bacterial wilt in tomato: importance of particle morphology and dissolution profiles
Source: Royal Society of Chemistry journal article supplement (doi:10.1039/d2en01040b), 2023-01-01
Supplement: d2en01040b1.pdf [file d2en01040b1.pdf]

## Supporting Information

### **Lanthanum-based nanomaterials suppress bacterial wilt in tomato: importance of particle morphology and dissolution profile**

Zhenyu Wang<sup>a,b</sup>, Tong Wang<sup>a,b</sup>, Chuanxi Wang<sup>a,b</sup>, Le Yue<sup>a,b</sup>, Jing Li<sup>a,b</sup>, Tianxi Liu<sup>c</sup>,  
Yan Lv<sup>c</sup>, Jason C. White<sup>d</sup>, Xuesong Cao<sup>a,b,\*</sup>, Baoshan Xing<sup>e</sup>

*<sup>a</sup>Institute of Environmental Processes and Pollution control, and School of Environment and Civil Engineering, Jiangnan University, Wuxi 214122, China*

*<sup>b</sup>Jiangsu Engineering Laboratory for Biomass Energy and Carbon Reduction Technology, and Jiangsu Key Laboratory of Anaerobic Biotechnology, Jiangnan University, Wuxi 214122, China*

*<sup>c</sup>Key Laboratory of Synthetic and Biological Colloids, Ministry of Education, School of Chemical and Material Engineering, International Joint Research Laboratory for Nano Energy Composites, Jiangnan University, Wuxi 214122, China*

*<sup>d</sup>The Connecticut Agricultural Experiment Station, New Haven, Connecticut 06511, United States*

*<sup>e</sup>Stockbridge School of Agriculture, University of Massachusetts, Amherst, Massachusetts 01003, United States*

\*Corresponding author:

*Tel.: +86 0510 85910935; Fax: +86 0510 85910935*

*E-mail address: caoxuesong@jiangnan.edu.cn (Dr. Xuesong Cao)*

## Experiment S1. La-based NMs synthesis and characterization

LaPO<sub>4</sub> NRs and LaPO<sub>4</sub> NPs were synthesized as described by Enikeeva et al. (2020) with slight modification.<sup>1</sup> Briefly, 4 mL N-butanl and 8 mL Na<sub>3</sub>PO<sub>4</sub> solution (0.25 M) were added into 8 mL LaCl<sub>3</sub> solution (2 mM). The pH of the mixed solution was adjusted to 6.5 using 0.1 M NaOH and HCl. The mixed solution was stirred 30 min at 400 rpm/min until forming white gelatinous substance and transferred to a 50 mL Teflon-lined stainless steel reaction kettle, with subsequent heating in the oven at 180 °C for 24 and 6 h to prepare LaPO<sub>4</sub> NRs and LaPO<sub>4</sub> NPs. The obtained white precipitates (LaPO<sub>4</sub> NRs and LaPO<sub>4</sub> NPs) were washed five times with ethanol and DI water, respectively. The synthesis method of La<sub>2</sub>S<sub>3</sub> NPs was based on Rashidi *et al.* (2020) with slight modification.<sup>2</sup> Briefly, 1.35 g LaCl<sub>3</sub>·7H<sub>2</sub>O and 0.78 g Na<sub>2</sub>S<sub>2</sub>O<sub>3</sub>·5H<sub>2</sub>O were added into 10 mL PEG-400, and then the mixture was stirred at 400 rpm/min and heated at 80 °C. After 30 min reaction, the mixture was further heated in an oven at 90 °C for 24 h. The obtained sediments (La<sub>2</sub>S<sub>3</sub> NPs) were washed three times with methanol, ethanol, and DI water, respectively. The preparation of La<sub>2</sub>O<sub>3</sub> NPs was followed the method reported by Srivastava *et al.* (2022) with slight modification.<sup>3</sup> Briefly, NaOH solution (1 M) was added into 100 mL LaCl<sub>3</sub>·7H<sub>2</sub>O (100 mM) solution drop by drop till the pH reached at 11. The obtained white precipitate (La(OH)<sub>3</sub>) was washed five times with DI water and suspended in 100 mL DI water. The La(OH)<sub>3</sub> suspension was transferred into 100 mL Teflon-lined stainless steel reaction kettle and heated at 200 °C for 8 h, with subsequent washing six times with DI water and 75% ethanol, respectively. The obtained La based NMs were freeze dried for 12 h.

The size and shape of La based NMs were observed using a transmission electron microscope (TEM, JEM-2100, Hitachi, Japan). The crystal structure of La based NMs was measured by X-ray diffraction (XRD, Bruker, Germany). The zeta potential and hydrodynamic diameter of 100 mg/L La based NMs were characterized using a Zetasizer (ZEN3600, Malvern, UK). The relative hydrophobicity of La based NMs was analyzed based on the method reported by Li *et al.* (2022).<sup>4</sup> Briefly, 4 mg/L Rose bengal (RB, hydrophobic dye) and Nile blue A (NB, hydrophilic dye) were prepared in phosphate buffered solution at pH 7.4. La based NMs suspensions (10 mL, 200 mg/L) were added into 10 mL dye solutions (4 mg/L) and incubated at 25 °C for 3 h, with subsequent centrifugation at 13000 rpm/min for 1 h. The concentration of RB and NB in supernatants were measured with a UV-vis spectrometer (UV-1800, SHIMADZU, Japan) at 549 and 620 nm, respectively. The relative hydrophobicity is represented by the dye adsorption ratio, calculated by the ratio of RB adsorption to NB adsorption. To assess the ion release ability of different La based NMs, 100 mg/L La based NMs suspensions were prepared and shaken at 200 rpm/min for 0, 12, 24, 48, 72, 96, and 120 h. La based NMs were removed from suspensions by centrifugation at 13000 rpm/min for 20 min and filtration with 0.22 µm membrane. In addition, the dissolution of La based NMs in the apoplastic and symplastic fluids extracted from tomato leaves were further explored. The apoplastic and symplastic fluids were extracted from tomato leaves following the method reported by Zhu et al. (2020).<sup>5</sup> The extracted apoplastic and symplastic fluids were ultrasonicated for 10 mins to release the biomolecular. Subsequently, La based NMs were suspended in apoplastic and symplastic fluids and

the La ions were extracted by following the above methods. The La content in supernatants was analyzed using an inductively coupled plasma mass spectrometry (ICP-MS, iCAP-TQ, Thermo Fisher, Germany).

### **Experiment S2. Phytohormone measurement**

The phytohormone content, including SA, JA, and abscisic acid (ABA), in tomato shoots was measured according to Li *et al.* (2016).<sup>6</sup> Briefly, 100 mg ground fresh tomato shoots were added into a 2 mL centrifuge tube containing 1 mL ethyl acetate (10 µg/mL butylated hydroxytoluene and 7.5 mg polyvinylpyrrolidone). The mixture was immediately vortexed for 15 min, ultrasonicated in an ice water bath for 15 min, and then centrifuged (13,000 rpm, 4 °C) for 10 min. The supernatant was concentrated under nitrogen, reconstituted in 200 µL 70% methanol, vortexed for 5 min, and sonicated on ice for 10 min. The supernatant was further purified by centrifugation (12000 rpm, 4°C, 10 min) and prepared for analysis using high-performance liquid chromatography-tandem mass spectrometry (HPLC-MS/MS, Thermo Scientific, Germany) using a Waters HSS T3 chromatographic column (1.8 µm 2.1×100 mm). The mobile phase was set as A (0.01% v/v, formic acid/water) and B (0.01% v/v, formic acid/acetonitrile) using the following separation program: 0-1.5 min (95% A/5% B), 9-10 min (30% A/70% B), and 10.1-15 min (95% A/5% B). The flow rate was 0.35 mL/min. The injected sample volume was 10 µL. The MS/MS detection was performed in negative ion mode with an electrospray voltage of -3.5 kV. The capillary temperature was 320 °C and the auxiliary gas heater temperature was 350 °C. Parallel Reaction Monitoring (PRM) was used as the collection mode of MS/MS data and the resolution of MS<sup>2</sup> was set at 17500.

### **Experiment S3. Analysis of antioxidant activity and oxidative stress level**

The activity of superoxide dismutase (SOD) and peroxidase (POD) in tomato shoots were analyzed according to the methods of Luo *et al.* (2021) with slight modification.<sup>7</sup> Firstly, 200 mg tomato leaves were homogenized in 2 mL 50 mM phosphate buffer solution (pH 7.8) under ice bath, and then centrifuged (12000 rpm, 4°C) for 30 min. The supernatant was used as the crude enzyme for activity analysis of SOD and POD. For SOD analysis, the crude enzyme was mixed with L-methionine, nitroblue tetrazole, riboflavin, and EDTA-2Na. The mixture was exposed under a fluorescent tube lamp (light intensity: 250 µmol m<sup>-2</sup>s<sup>-1</sup>) for 20 min, and then determined by a multifunctional microplate at 560 nm. SOD activity takes the amount of enzyme required to inhibit NBT photoreduction by 50% as one unit of SOD. For POD activity, the crude enzyme was mixed with 200 mM phosphate buffer solution (pH 6.0) containing guaiacol solution and 30% H<sub>2</sub>O<sub>2</sub>, the mixtures were immediately measured in the wavelength of 470 nm for 2min each 30s by a multifunctional microplate reader. The increase in OD value of 0.01 per minute was considered as one unit of POD. The content of malondialdehyde (MDA) can be used to reflect the degree of membrane lipid peroxidation which was assayed following the methods of Li *et al.* (2020).<sup>8</sup> Briefly, tomato leaves were homogenized in 0.1% (w/v) trichloroacetic acid in an ice bath, and then centrifuged (12000 rpm, 4°C) for 10 min. The supernatant was mixed with 0.5%

(m/v) thiobarbituric acid (dissolved in 10% trichloroacetic acid). After 10 min incubation in boiling water, the mixtures were rapidly cooled in an ice bath. The absorbance was measured at 532 and 600 nm by a multifunctional microplate reader. *In vivo* hydrogen peroxide ( $H_2O_2$ ) detection was measured based on Ma *et al.* (2016).<sup>9</sup> Briefly, tomato leaves were infiltrated with 3,3'-diaminobenzidine solution (1 g/L, pH 3.8, 5 h) under vacuum, and then heated in 95% ethanol to remove the chlorophyll. Subsequently, the samples were photographed and analyzed for relative  $H_2O_2$  levels based on the area of brown points using Image J software.

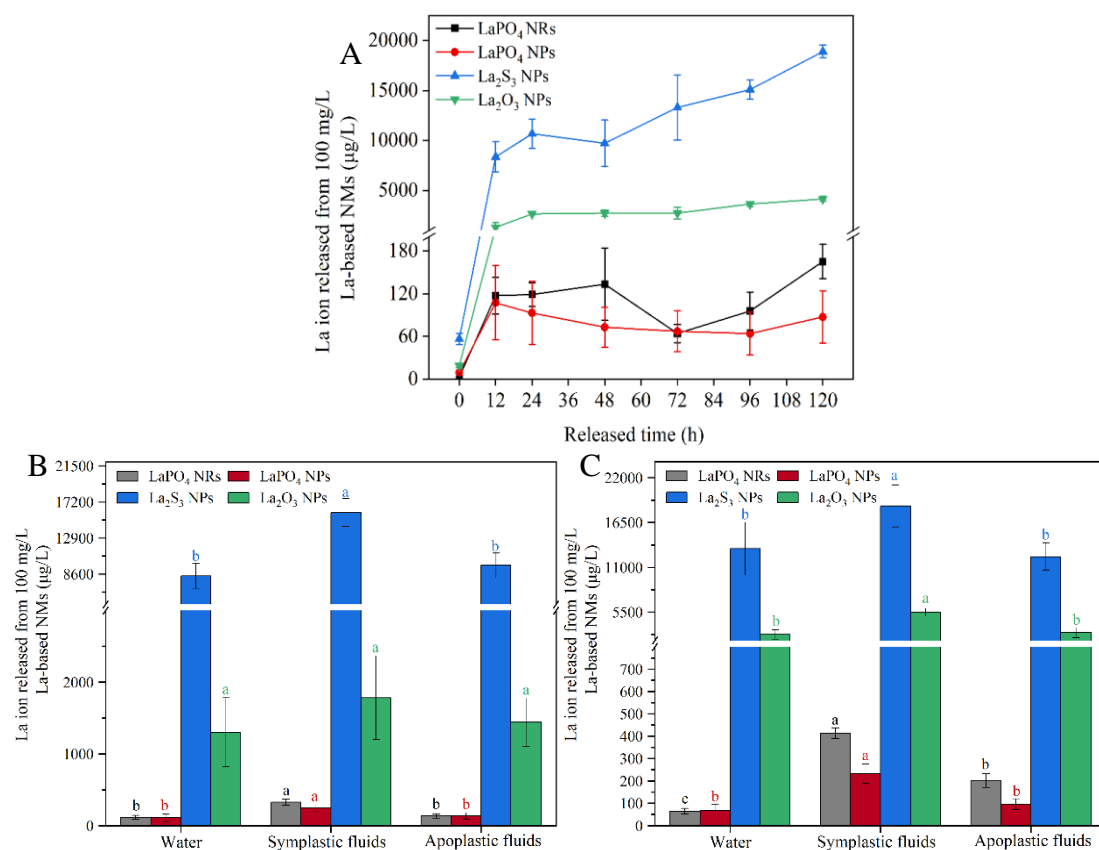

Figure S1 (A) The concentration of La ions released from 100 mg/L LaPO<sub>4</sub> NRs, LaPO<sub>4</sub> NPs, La<sub>2</sub>S<sub>3</sub> NPs, and La<sub>2</sub>O<sub>3</sub> NPs suspensions in DI water as function of exposure time (0, 12, 24, 48, 72, 96, and 120 h); (B) La dissolution from 100 mg/L LaPO<sub>4</sub> NRs, LaPO<sub>4</sub> NPs, La<sub>2</sub>S<sub>3</sub> NPs, and La<sub>2</sub>O<sub>3</sub> NPs in the apoplastic and symplastic fluids extracted from tomato leaves after 12 h exposure; (C) La dissolution from 100 mg/L LaPO<sub>4</sub> NRs, LaPO<sub>4</sub> NPs, La<sub>2</sub>S<sub>3</sub> NPs, and La<sub>2</sub>O<sub>3</sub> NPs in the apoplastic and symplastic fluids extracted from tomato leaves after 72 h exposure. The significant difference among different treatments is marked with different letters ( $p < 0.05$ , LSD,  $n = 6$ ).

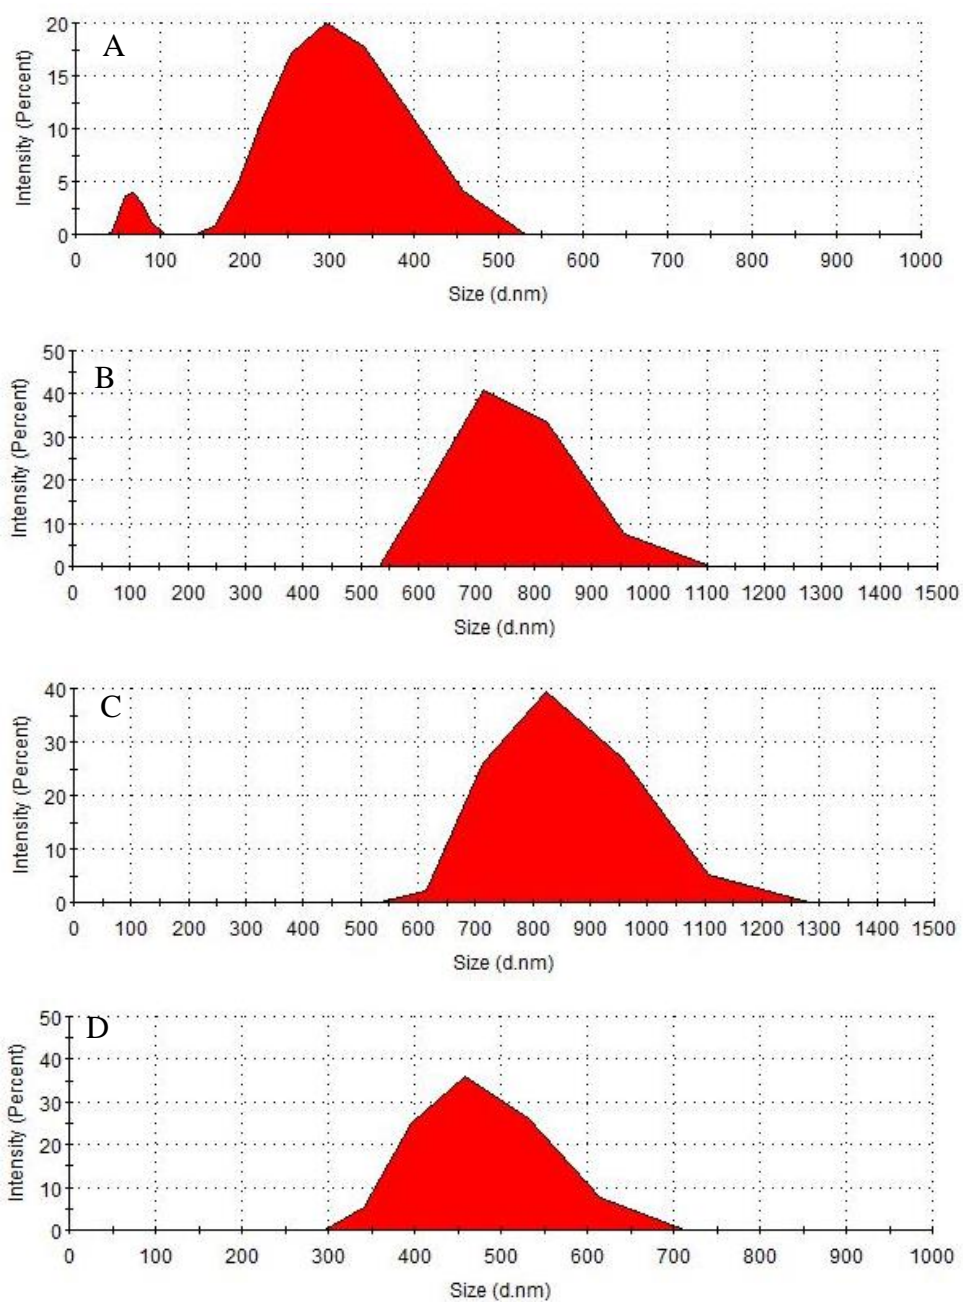

Figure S2 The size distribution diagrams of  $\text{LaPO}_4$  NRs (A),  $\text{LaPO}_4$  NPs (B),  $\text{La}_2\text{S}_3$  NPs (C), and  $\text{La}_2\text{O}_3$  NPs (D) suspension in DI water.

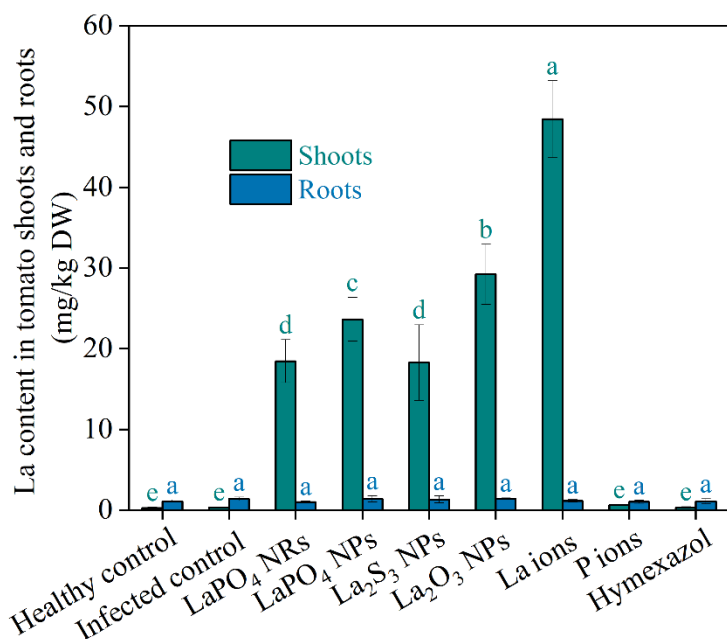

Figure S3 The content of La in tomato shoots and roots after foliar application with 100 mg/L La based nanomaterials with different formulation (LaPO<sub>4</sub> NRs, LaPO<sub>4</sub> NPs, La<sub>2</sub>S<sub>3</sub> NPs, and La<sub>2</sub>O<sub>3</sub> NPs), 105 mg/L LaCl<sub>3</sub> (La ions, equivalent La mass with 100 mg/L LaPO<sub>4</sub> NPs), 70 mg/L Na<sub>3</sub>PO<sub>4</sub> (P ions, equivalent P mass with 100 mg/L LaPO<sub>4</sub> NPs), and 300 mg/L hymexazol. The significant difference among different treatments is marked with different letters ( $p < 0.05$ , LSD,  $n = 6$ ).

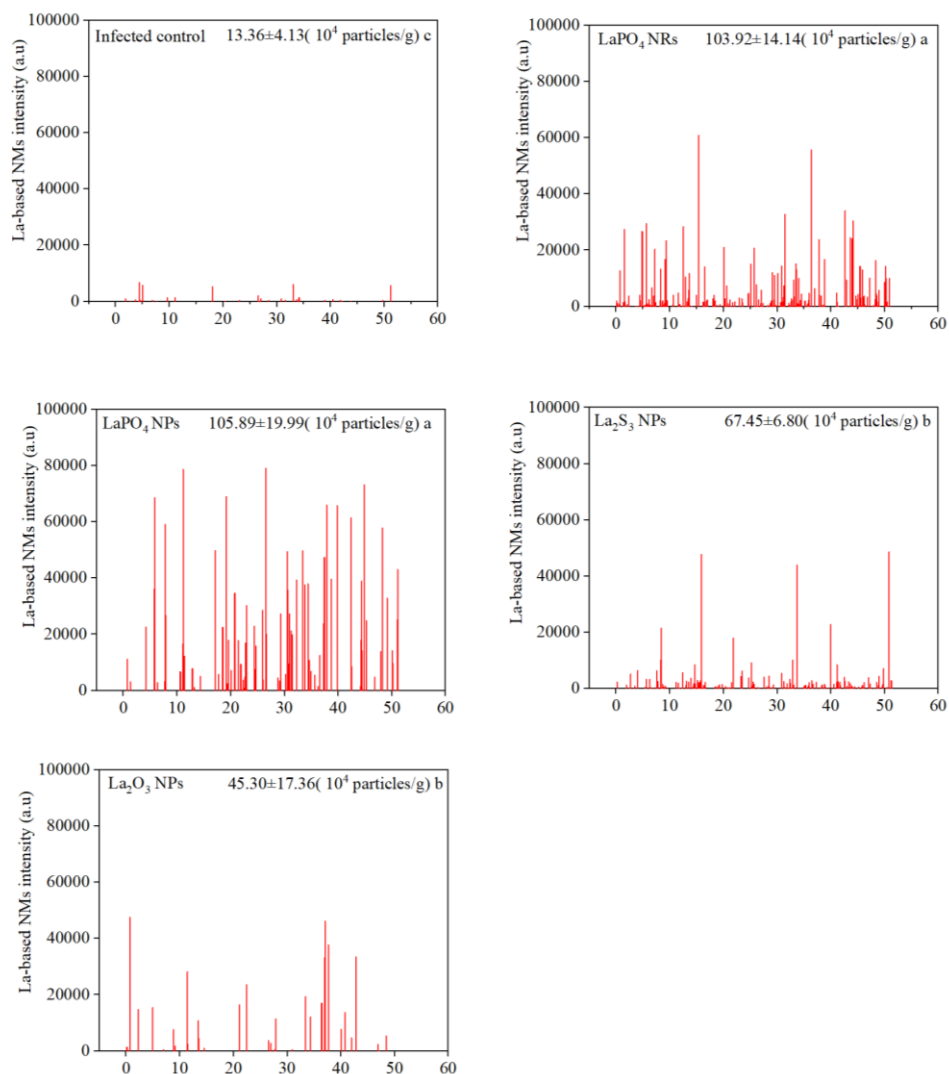

Figure S4 The content of La based NMs in tomato shoots after application with  $\text{LaPO}_4$  NRs,  $\text{LaPO}_4$  NPs,  $\text{La}_2\text{S}_3$  NPs, and  $\text{La}_2\text{O}_3$  NPs as analyzed using a sp-ICP-MS.

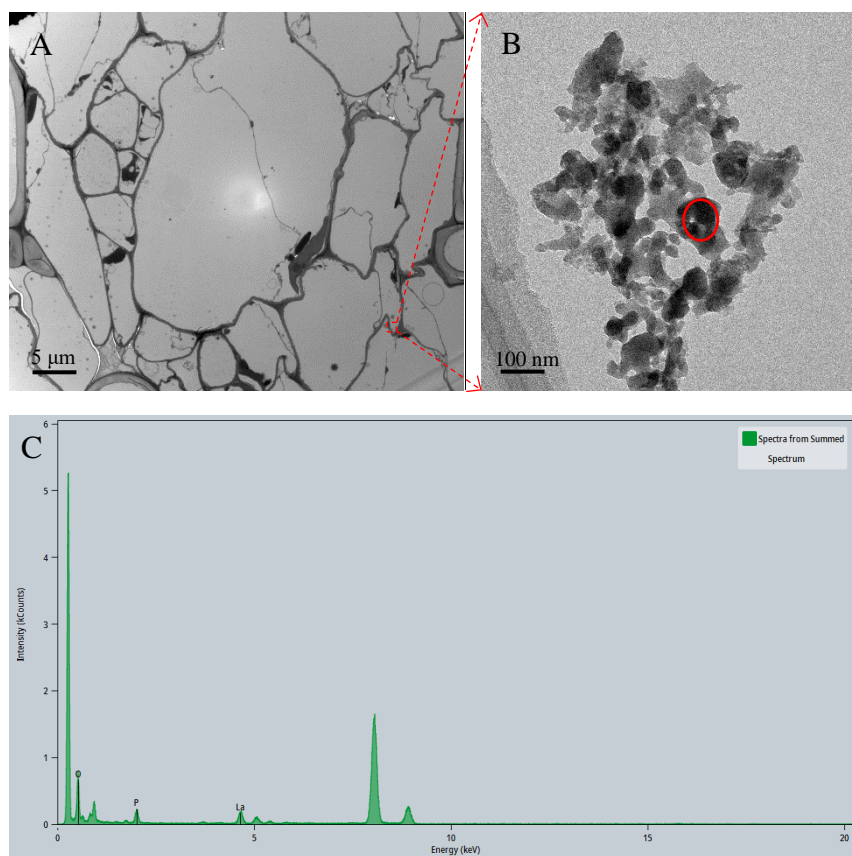

Figure S5 (A) TEM image of tomato stem after foliar application with  $\text{LaPO}_4$  NPs; (B) Magnified view of the region squared in panel A; (C) EDS point scanning of the region squared in panel B.



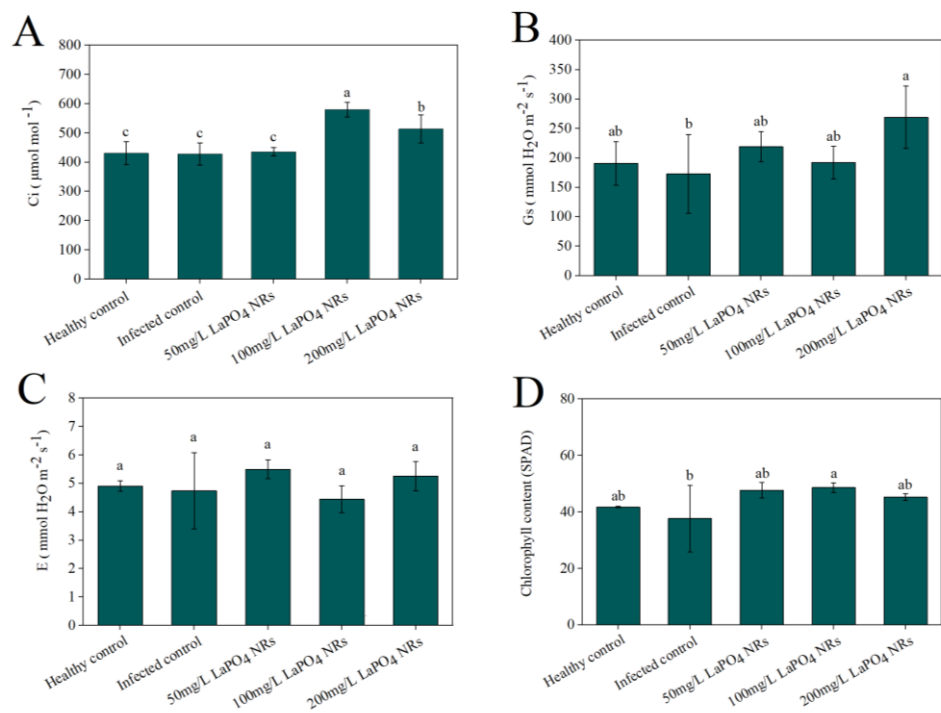

Figure S6 The photosynthetic endpoints (Ci (A), Gs (B), E (C), and chlorophyll content (D)) of *Ralstonia solanacearum* infected tomatoes after foliar application with different concentrations (50, 100, and 200 mg/L) LaPO<sub>4</sub> NRs. The significant difference among different treatments is marked with different letters ( $p < 0.05$ , LSD,  $n = 6$ ).

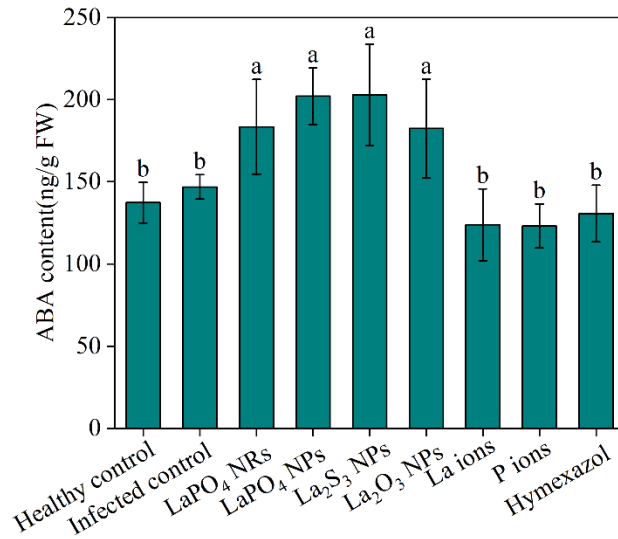

Figure S7 The concentration of ABA in pathogen infected tomato shoots as affect by foliar application with LaPO<sub>4</sub> NRs, LaPO<sub>4</sub> NPs, La<sub>2</sub>S<sub>3</sub> NPs, La<sub>2</sub>O<sub>3</sub> NPs, La ions, P ions, and hymexazol. The significant difference among different treatments is marked with different letters ( $p < 0.05$ , LSD,  $n = 6$ ).

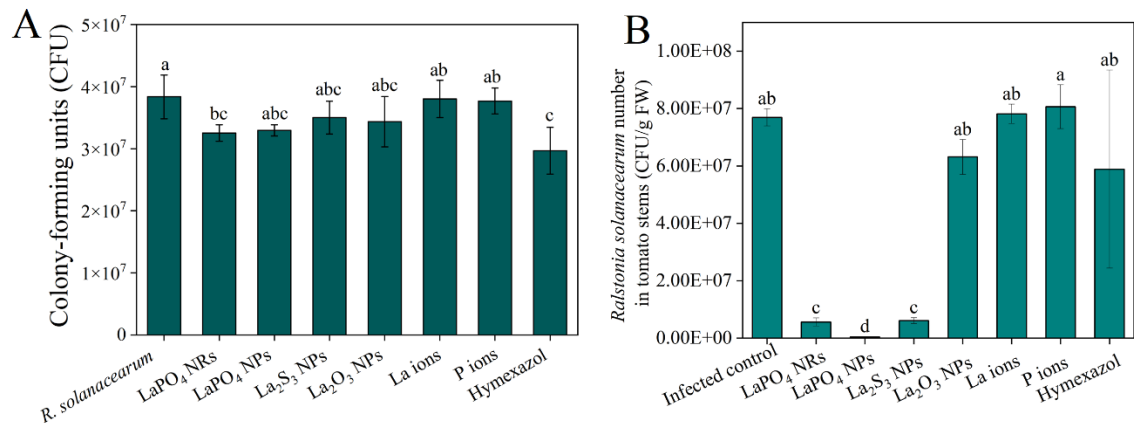

Figure S8 (A) Growth of *Ralstonia solanacearum* on PDA plates after exposure to 100 mg/L La based NMs (LaPO<sub>4</sub> NRs, LaPO<sub>4</sub> NPs, La<sub>2</sub>S<sub>3</sub> NPs, and La<sub>2</sub>O<sub>3</sub> NPs), 105 mg/L LaCl<sub>3</sub> (La ions, equivalent La mass with 100 mg/L LaPO<sub>4</sub> NPs), 70 mg/L Na<sub>3</sub>PO<sub>4</sub> (P ions, equivalent P mass with 100 mg/L LaPO<sub>4</sub> NPs), and 300 mg/L hymexazol, respectively; (B) The abundance of *Ralstonia solanacearum* in tomato stems upon foliar application with 100 mg/L La based nanomaterials (LaPO<sub>4</sub> NRs, LaPO<sub>4</sub> NPs, La<sub>2</sub>S<sub>3</sub> NPs, and La<sub>2</sub>O<sub>3</sub> NPs), 105 mg/L LaCl<sub>3</sub> (La ions, equivalent La mass with 100 mg/L LaPO<sub>4</sub> NPs), 70 mg/L Na<sub>3</sub>PO<sub>4</sub> (P ions, equivalent P mass with 100 mg/L LaPO<sub>4</sub> NPs), and 300 mg/L hymexazol, respectively. The significant difference among different treatments is marked with different letters ( $p < 0.05$ , LSD,  $n=6$ ).

Table S1 Primers used in the investigation the expression of disease-related genes by an RT-qPCR approach.

| Gene name                                                    | Gene symbol | Forward prime (5'-3')    | Reverse primer (5'-3')  | References |
|--------------------------------------------------------------|-------------|--------------------------|-------------------------|------------|
| Actin-7-like                                                 | Actin       | TGTCCCTATCTACGAGGGTTATGC | CAGTTAAATCACGACCAGCAAGA | 1          |
| Pathogenesis-related protein PR-5                            | PR5         | GGCCCATGTGGTCCTACAAA     | GGCAACATAGTTTAGCAGACCG  | 1          |
| Pathogenesis-related protein P4                              | P4          | GCAACAATGGGTGGTGGTTC     | ACCTAAGCCACGATACCATGA   | 1          |
| Jasmonic acid 2                                              | JA2         | ACGGGGACGGATAAGGTGAT     | GCACCCATTCTAGCTTTGAA    | 1          |
| Non-expressor of pathogenesis-related protein 1              | NPR1        | ACAAGTTGATGGCACGTCTG     | CCGATTCAAGTGCTCCTCTT    | 2          |
| Pathogenesis-related protein P2                              | PR-P2       | GATGCTGACAAGCCTCTGG      | TCCTGTTCTGTGTTGGTCA     | 2          |
| Pathogenesis-related protein 1                               | PR1         | TGCAAAATGGTGGGCAAATTCA   | GCCCAAGCATTAACGGCATC    | 2          |
| Pathogenesis-related genes transcriptional activator<br>PTI5 | PTI5        | GCGATTCGGCTAGACATGGT     | CCTCGCATTCTAAAAGCCGC    | 3          |
| Calmodulin 1                                                 | CAM1        | GTTTCCCAATCTGCAACTTCTCT  | AGTTGTGATAACAACCATCTCCG | 4          |
| Calmodulin 3                                                 | CAM3        | CTGTAATCGAAGAGGCGAGAAG   | GTTGTAATGCAACCATCTCCG   | 4          |
| Jasmonic acid-amido synthetase JAR1                          | JAR1        | CCCCTCGAGGAAAATCTCGTA    | CTGGAGTGCCATTGTGGAAT    | 5          |

Table S2. Instrumental parameters for sp-ICP-MS data acquisition

| Optimized ICP-MS operating condition |                       |                       |                                    |                                    |
|--------------------------------------|-----------------------|-----------------------|------------------------------------|------------------------------------|
| Materials                            | LaPO <sub>4</sub> NRs | LaPO <sub>4</sub> NPs | La <sub>2</sub> S <sub>3</sub> NPs | La <sub>2</sub> O <sub>3</sub> NPs |
| Analyte                              | La <sup>139</sup>     | La <sup>139</sup>     | La <sup>139</sup>                  | La <sup>139</sup>                  |
| Mass fraction (%)                    | 0.59                  | 0.59                  | 0.74                               | 0.85                               |
| Density (g/cm <sup>3</sup> )         | 4.51                  | 4.51                  | 4.91                               | 6.51                               |
| Dwell time (ms)                      | 100                   | 100                   | 100                                | 100                                |
| Scan time (s)                        | 3                     | 3                     | 3                                  | 3                                  |
| Sample flow rate (mL/min)            | 90                    | 90                    | 90                                 | 90                                 |
| Mode                                 | KED                   | KED                   | KED                                | KED                                |

Table S3. The hydrodynamic diameter, zeta potential, and relative hydrophobicity of La based NMs with different morphologies and components. The significant difference among different treatments is marked with different letters ( $p < 0.05$ , LSD,  $n = 6$ ).

| Materials                  | LaPO <sub>4</sub> NRs   | LaPO <sub>4</sub> NPs   | La <sub>2</sub> S <sub>3</sub> NPs | La <sub>2</sub> O <sub>3</sub> NPs |
|----------------------------|-------------------------|-------------------------|------------------------------------|------------------------------------|
| Hydrodynamic diameter (nm) | 319.2±39.8 <sup>d</sup> | 942.7±31.2 <sup>b</sup> | 1051.0±146.8 <sup>a</sup>          | 570.8±44.7 <sup>c</sup>            |
| Zeta potential (mV)        | 26.1±1.9 <sup>b</sup>   | 4.8±0.6 <sup>d</sup>    | 12.0±1.4 <sup>c</sup>              | 33.8±1.0 <sup>a</sup>              |
| Relative hydrophobicity    | 0.7±0.2 <sup>c</sup>    | 6.0±1.2 <sup>a</sup>    | 1.9±0.2 <sup>bc</sup>              | 2.5±0.5 <sup>b</sup>               |

Table S4. The content of macrolelements and microelements in pathogen infected tomato shoots after foliar application with LaPO<sub>4</sub> NRs, LaPO<sub>4</sub> NPs, La<sub>2</sub>S<sub>3</sub> NPs, La<sub>2</sub>O<sub>3</sub> NPs, La ions, P ions, and hymexazol. The significant difference among different treatments is marked with different letters ( $p < 0.05$ , LSD,  $n = 6$ ).

| Treatments                         | P (g/kg)        | S (g/kg)     | Mg (g/kg)    | Ca (g/kg)      | K (g/kg)     |
|------------------------------------|-----------------|--------------|--------------|----------------|--------------|
| Healthy control                    | 1.96±0.20ab     | 7.07±0.80c   | 11.82±2.83a  | 40.31±11.11b   | 38.21±11.61a |
| Infected control                   | 1.43±0.18d      | 7.59±1.29bc  | 11.95±1.43a  | 44.31±3.30ab   | 30.13±4.08ab |
| LaPO <sub>4</sub> NRs              | 2.15±0.27a      | 8.51±1.27ab  | 10.91±1.16a  | 42.10±3.27b    | 32.79±8.95ab |
| LaPO <sub>4</sub> NPs              | 2.10±0.14ab     | 8.73±1.21ab  | 12.26±1.34a  | 48.44±5.41ab   | 28.61±2.64b  |
| La <sub>2</sub> S <sub>3</sub> NPs | 1.77±0.08bc     | 9.24±0.93a   | 10.0±1.16a   | 42.13±3.64b    | 29.53±4.58b  |
| La <sub>2</sub> O <sub>3</sub> NPs | 1.58±0.06cd     | 8.50±1.03ab  | 12.55±2.41a  | 44.83±6.22ab   | 29.78±10.80b |
| La ions                            | 1.76±0.14bc     | 8.16±0.76abc | 11.30±1.67a  | 42.04±7.12b    | 27.33±5.77b  |
| P ions                             | 1.96±0.17ab     | 8.35±0.81ab  | 12.64±1.41a  | 51.055±7.81a   | 28.84±4.03b  |
| Hymexazol                          | 1.43±0.01d      | 8.25±0.97bc  | 11.35±0.20a  | 39.91±2.11b    | 29.83±3.72b  |
| Treatments                         | Fe (mg/kg)      | Zn (mg/kg)   | Cu (mg/kg)   | Mn (mg/kg)     | Mo (mg/kg)   |
| Healthy control                    | 724.87±46.96ab  | 58.68±5.87a  | 9.91±1.63b   | 157.80±5.56a   | 1.93±0.19b   |
| Infected control                   | 535.90±114.69cd | 37.28±1.71d  | 13.05±2.43a  | 118.99±7.89c   | 1.36±0.24c   |
| LaPO <sub>4</sub> NRs              | 642.36±96.88bc  | 46.64±3.09bc | 10.79±3.71ab | 166.94±23.07a  | 2.02±0.21ab  |
| LaPO <sub>4</sub> NPs              | 854.61±122.19a  | 49.83±5.49b  | 11.85±1.35ab | 163.53±12.21a  | 2.33±0.29a   |
| La <sub>2</sub> S <sub>3</sub> NPs | 434.68±86.98d   | 45.58±3.84bc | 10.16±3.26ab | 153.39±7.89ab  | 2.13±0.08ab  |
| La <sub>2</sub> O <sub>3</sub> NPs | 525.67±91.90cd  | 48.53±14.50b | 11.67±3.13ab | 156.68±6.92ab  | 2.21±0.19ab  |
| La ions                            | 533.86±131.41cd | 39.56±6.16cd | 10.77±1.75ab | 116.07±31.23c  | 1.45±0.32c   |
| P ions                             | 558.20±89.56cd  | 37.19±3.18d  | 10.29±1.84ab | 132.58±17.90bc | 1.46±0.43c   |
| Hymexazol                          | 481.96±35.51d   | 37.37±2.95d  | 13.94±1.25a  | 124.36±5.08c   | 1.48±0.15c   |

## References

1. M.O. Enikeeva, K.M. Kenges, O.V. Proskurina, D.P. Danilovich and V.V. Gusarov, Influence of Hydrothermal Treatment Conditions on the Formation of Lanthanum Orthophosphate Nanoparticles of Monazite Structure. *Russ. J. Appl. Chem.*, 2020, **93**, 540-548.
2. H. Rashidi Nodeh, H. Sereshti, E. Beirakabad and K. Razmkhah, Synthesis and Application of Lanthanum Sulfide Nanoparticles for Removal of Tetracycline from Aqueous Media. *Int. J. Environ. Sci. Technol.*, 2020, **17**, 819-828.
3. A. Srivastava, G. Mishra, J. Singh and M.D. Pandey, A Highly Efficient Nanostructured Au@La<sub>2</sub>O<sub>3</sub> Based Platform for Dopamine Detection. *Mater. Lett.*, 2022, **308**, 131231.
4. G. Li, Z. Cao, Z., K.K. Ho and Y.Y. Zuo, Quantitative Determination of the Hydrophobicity of Nanoparticles. *Anal. Chem.*, 2022, **94**, 2078-2086.
5. J. Zhu, J. Li, Y. Shen, S. Liu, N. Zeng, X. Zhan, J. C. White, J. Gardea-Torresdey and B. Xing, Mechanism of Zinc Oxide Nanoparticle Entry into Wheat Seedling Leaves. *Environ. Sci.: Nano*, 2020, **7**, 3901-3913.
6. Y. Li, C. Zhou, X. Yan, J. Zhang and J. Xu, Simultaneous Analysis of Ten Phytohormones in *Sargassum Horneri* by High-Performance Liquid Chromatography with Electrospray Ionization Tandem Mass Spectrometry. *J. Sep. Sci.*, 2016, **39**, 1804-1813.
7. X. Luo, X. Cao, C. Wang, L. Yue, X. Chen, H. Yang, X. Le, X. Zhao, F. Wu, Z. Wang and B. Xing, Nitrogen-doped Carbon Dots Alleviate the Damage from Tomato Bacterial Wilt Syndrome: Systemic Acquired Resistance Activation and Reactive Oxygen Species Scavenging. *Environ. Sci.: Nano*, 2021, **8**, 3806-3819.
8. Y. Li, J. Gao, X. Xu, Y. Wu, J. Zhuang, X. Zhang, H. Zhang, B. Lei, M. Zheng, Y. Liu and C. Hu, Carbon Dots as a Protective Agent Alleviating Abiotic Stress on Rice (*Oryza sativa* L.) through Promoting Nutrition Assimilation and the Defense System. *ACS Appl. Mater. Inter.*, 2020, **12**, 33575-33585.
9. C. Ma, H. Liu, H. Guo, C. Musante, S.H. Coskun, B.C. Nelson, J.C. White, B. Xing and O.P. Dhankhe, Defense Mechanisms and Nutrient Displacement in *Arabidopsis thaliana* upon Exposure to CeO<sub>2</sub> and In<sub>2</sub>O<sub>3</sub> Nanoparticles. *Environ. Sci.: Nano*, 2016, **3**, 1369-1379.
